# Supplementary material for: Corticospinal Tract and Related Grey Matter Morphometric Shape Analysis in ALS Phenotypes: A Fractal Dimension Study
Source: MDPI journal article supplement (doi:10.3390/brainsci11030371), 2021-03-14
Supplement: s1 [file s1]

## Supplementary Material

# Corticospinal Tract and Related Grey Matter Morphometric Shape Analysis in ALS Phenotypes: A Fractal Dimension Study

Venkateswaran Rajagopalan and Erik P. Pioro

**Table S1.** –Clinical characteristics of neurological controls.

| Subject | Clinical condition                                                  |
|---------|---------------------------------------------------------------------|
| 1       | Severe fatigue                                                      |
| 2       | Stiff person syndrome with severe spasticity                        |
| 3       | Parkinsonism                                                        |
| 4       | Depression, cervical cancer, fibromyalgia                           |
| 5       | Fibromyalgia-like or myofascial pain syndrome                       |
| 6       | Painful sensory polyneuropathy                                      |
| 7       | Insomnia from involuntary muscle twitches                           |
| 8       | Parkinson's disease or parkinsonism                                 |
| 9       | Lower motor neuron abnormalities at cervical and lumbosacral levels |
| 10      | Non-length dependent small fiber sensory neuropathy                 |
| 11      | Pain in joint, pain in lower leg                                    |
| 12      | Small fiber neuropathy                                              |
| 13      | Large fiber neuropathy                                              |
| 14      | Fibromyalgia-like syndrome                                          |

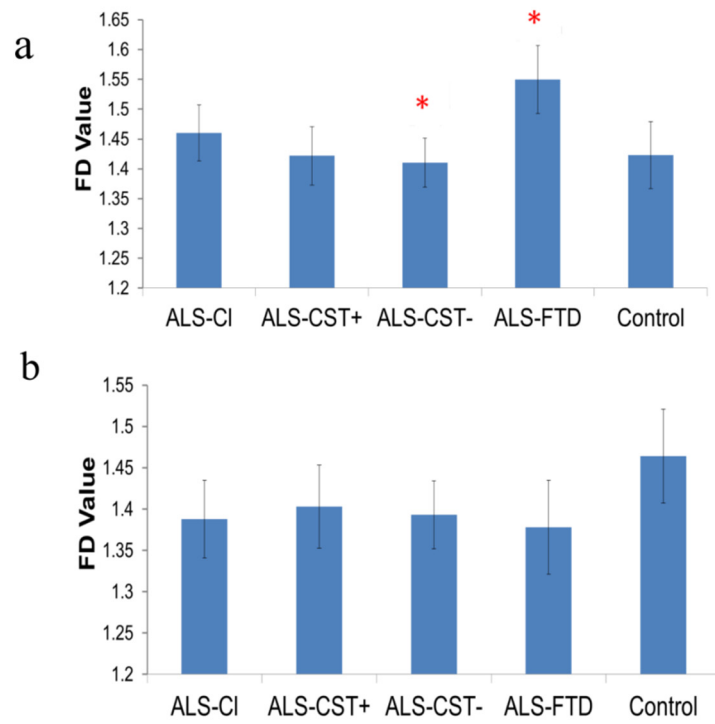

**Figure S1.** - Compared to neurologic controls, FD values ( $\pm$ standard error of mean, SEM) of PMC-CST are significantly decreased in ALS-CST- patients and increased in ALS-FTD patients of only the right (a) but not left (b) hemisphere. \*indicates significance between groups at  $p < 0.05$ .

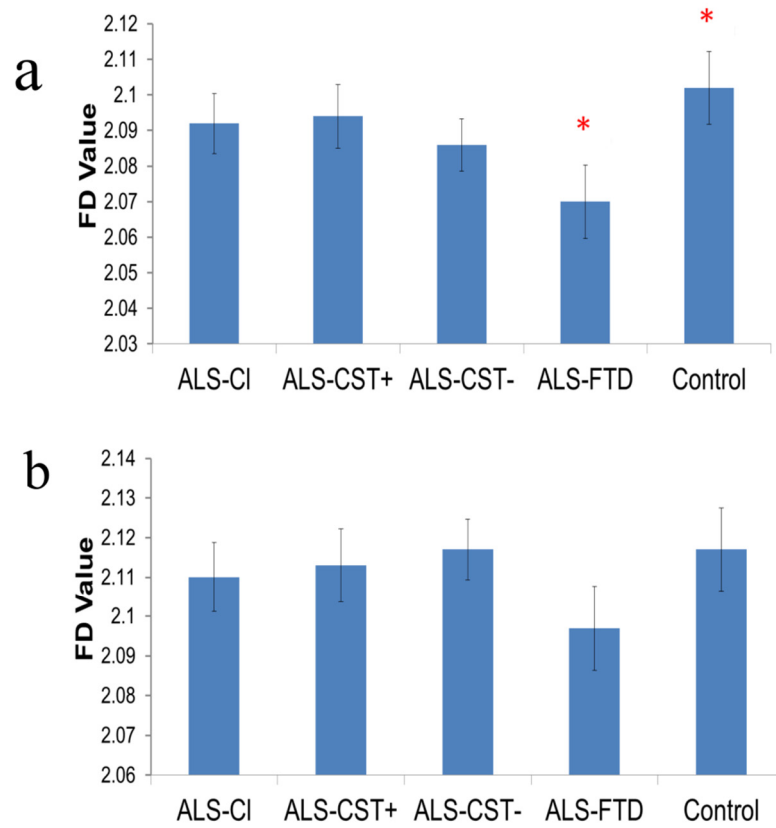

**Figure S2.** - Compared to neurologic controls, FD values ( $\pm$ SEM) of PMC GM are significantly decreased in right (a) but not left (b) hemisphere of only ALS-FTD patients. \*indicates significance between groups at  $p < 0.05$ .

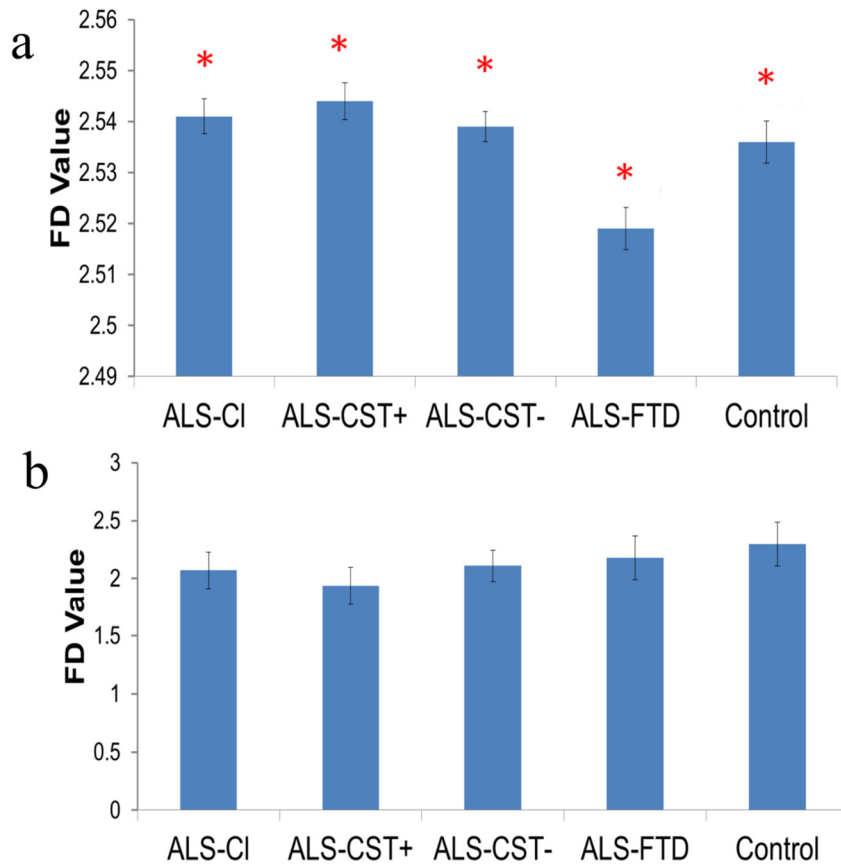

**Figure S3.** - Compared to neurologic controls, FD values ( $\pm$ SEM) of non-PMC and non-PSC GM in (a) are increased in ALS-CI, ALS-CST+, and ALS-CST- patients but decreased in ALS-FTD patients. However, FD values ( $\pm$ SEM) of non-CST WM in (b) are not significantly different between neurologic controls and ALS groups. \*indicates significance between groups at  $p < 0.05$ .
